# Supplementary material for: Colorectal Cancer-Associated Bacterial Genes Are Widely Encoded In Human Microbiomes
Source: Research Square preprint supplement (doi:10.21203/rs.3.rs-1918763/v1), 2022-08-08
Supplement: Supplementary file 1 [file 3cb99b6438d7e72b7006d3be.xlsx]

## Sheet: Table S1
Bacteria	Reference
Streptococcus gallolyticus	Klein et al. NEJM 1977.
Bacteroides fragilis	Topak et al. Clinical Microbiology and Infection 2006.
Enterococcus faecalis	Wang et al. Cancer Research 2008.
Escherichia coli	Swidsinski et al. Gastroenterology 1998.
Fusobacterium nucleatum	Kostic et al. Genome Research 2012.
Peptostreptococcus anaerobius	Long et al. Nature Microbiology 2019.
Prevotella	Yang et al. Nature Experimental and Molecular Medicine 2019.
Parvimonas micra	Löwenmark et al. Nature Scientific Reports 2020.
Porphyromonas gingivalis	Okumura et al. Nature Communications 2021; Wang et al. Cancer Research 2021.
