# Supplementary material for: Colorectal Cancer-Associated Bacterial Genes Are Widely Encoded In Human Microbiomes
Source: Research Square preprint supplement (doi:10.21203/rs.3.rs-1918763/v1), 2022-08-08
Supplement: Supplementary file 2 [file e1683903c65cfdb3ccbe82d4.xlsx]

## Sheet: Table 1
Table 1. Training and validation datasets.
Dataset	NCBI BioProject ID	Reference	CRC cases	Adenoma cases*	Healthy controls	Median sequencing depth
Training	PRJEB10878	Yu et al., Gut 2017.	75	0	53	56.2M reads/sample
Training	PRJEB6070	Zeller et al., Molecular Systems Biology 2014.	91	42	66	58.0M reads/sample
Training	PRJEB7774	Feng et al., Nature Communications 2015.	46	47	63	52.7M reads/sample
Validation	PRJDB4176	Yachida et al., Nature Medicine 2019.	258	0	251	46.3M reads/sample
* Adenoma metagenomes were not used for training the CAG-based model.
